# Supplementary material
Source: PubMed Central journal article supplement (PMC6036906)
Supplement: jamaneurol-75-591-s001.pdf [file jamaneurol-75-591-s001.pdf]

## Supplementary Online Content

Coutelier M, Hammer MB, Stevanin G, et al; Spastic Paraplegia and Ataxia Network. Efficacy of exome-targeted capture sequencing to detect mutations in known cerebellar ataxia genes. *JAMA Neurol*. Published online February 26, 2018. doi:10.1001/jamaneurol.2017.5121

**eTable 1.** Known CA Genes

**eTable 2.** List of Possibly to Definitely Causative Variants

**eTable 3.** Variants of Unknown Significance

This supplementary material has been provided by the authors to give readers additional information about their work.

**eTable 1: Known CA genes**

| Gene Symbol     | OMIM #  | Original phenotype                                                                                                                                                                                  | Phenotypic extension                                                                                                                                                                                          | Transmission mode | ADCA analysis |
|-----------------|---------|-----------------------------------------------------------------------------------------------------------------------------------------------------------------------------------------------------|---------------------------------------------------------------------------------------------------------------------------------------------------------------------------------------------------------------|-------------------|---------------|
| <i>AARS2</i>    | *612035 | COXPD8 (#614096) : combined oxidative phosphorylation deficiency-8 (infantile hypertrophic mitochondrial cardiomyopathy) (Gotz 2011)                                                                | LKENP (#615889) : Progressive leukoencephalopathy with ovarian failure (Dallabona 2014)                                                                                                                       | AR                |               |
| <i>ABHD12</i>   | *613599 | PHARC (#612674) : progressive polyneuropathy, hearing loss, ataxia, retinitis pigmentosa, and cataract (Fiskerstrand 2010)                                                                          | Non-syndromic retinal degeneration (Nishiguchi 2014)                                                                                                                                                          | AR                |               |
| <i>ACO2</i>     | *100805 | ICRD (#614559) : infantile cerebellar - retinal degeneration (Spiegel 2012)                                                                                                                         | OPA9 (#616289) : Optic atrophy type 9 (Metodiev 2014)                                                                                                                                                         | AR                |               |
| <i>ADCK3</i>    | *606980 | COQ10D4 (#612016) : primary coenzyme Q deficiency-4 (Mollet 2008, Lagier-Tourenne 2008)                                                                                                             |                                                                                                                                                                                                               | AR                |               |
| <i>AFG3L2</i>   | *604581 | SCA28 (#610246)(Di Bella 2010)                                                                                                                                                                      | SPAX5 (#614487) (Pierson 2011); optic atrophy (Charif 2015)                                                                                                                                                   | AD / AR           | Yes           |
| <i>AH11</i>     | *608894 | JBTS3 (#608629) : Joubert syndrome-3 (Ferland 2004, Dixon-Salazar 2004)                                                                                                                             |                                                                                                                                                                                                               | AR                |               |
| <i>ALDH18A1</i> | *138250 | Autosomal recessive cutis laxa type IIIA (#219150) (Baumgartner 2005)                                                                                                                               | Autosomal dominant spastic paraplegia 9A (#601162) (Coutelier 2015) / autosomal recessive spastic paraplegia 9B (#601162) (Coutelier 2015) / autosomal dominant cutis laxa 3 (#616603) (Fischer-Zirnsak 2015) | AR / AD           |               |
| <i>ALS2</i>     | *606352 | Juvenile ALS 2 (#205100); juvenile primary lateral sclerosis (#606353) (Yang 2001, Hadano 2001)                                                                                                     | Infantile ascending HSP (#607225) (Eymard-Pierre 2002)                                                                                                                                                        | AR                |               |
| <i>AMPD2</i>    | *102771 | PCH9: pontocerebellar hypoplasia type 9 (#615809) (Akizu 2013)                                                                                                                                      | SPG63: spastic paraplegia type 63 (#615686) (Novarino 2014)                                                                                                                                                   | AR                |               |
| <i>ANO10</i>    | *613726 | SCAR10: autosomal recessive spinocerebellar ataxia type 10 (#613728) (Vermeer 2010)                                                                                                                 | Associated low CoQ10 levels (Balreira 2014)                                                                                                                                                                   | AR                |               |
| <i>AP4B1</i>    | *607245 | SPG47: autosomal recessive spastic paraplegia type 47 = CPSQ5: Cerebral Palsy with Microcephaly & Intellectual Disability 5 (#614066) (Abou Jamra 2011, Bauer 2012, Tuysuz 2014, Abdollahpour 2015) |                                                                                                                                                                                                               | AR                |               |
| <i>AP4E1</i>    | *607244 | SPG51: autosomal recessive spastic paraplegia type 51 = CPSQ4 (#613744) (Moreno-De-Luca 2011, Abou Jamra 2011, Najmabadi 2011)                                                                      |                                                                                                                                                                                                               | AR                |               |

| Gene Symbol (continued) | OMIM #  | Original phenotype                                                                                                                                    | Phenotypic extension                                                                                                                                                                                                                      | Transmission mode                  | ADCA analysis |
|-------------------------|---------|-------------------------------------------------------------------------------------------------------------------------------------------------------|-------------------------------------------------------------------------------------------------------------------------------------------------------------------------------------------------------------------------------------------|------------------------------------|---------------|
| <i>AP4M1</i>            | *602296 | SPG50: autosomal recessive spastic paraplegia type 50 / CPSQ3 (#612936) (Verkerk 2009)                                                                |                                                                                                                                                                                                                                           | AR                                 |               |
| <i>AP4S1</i>            | *607243 | SPG52: autosomal recessive spastic paraplegia type 52 = CPSQ6 (#614067) (Abou Jamra 2011)                                                             |                                                                                                                                                                                                                                           | AR                                 |               |
| <i>AP5Z1</i>            | *613653 | SPG48: autosomal recessive spastic paraplegia type 48 (#613647) (Slabicki 2010)                                                                       |                                                                                                                                                                                                                                           | AR                                 |               |
| <i>APTX</i>             | *606350 | AOA1: Early-onset ataxia with oculomotor apraxia and hypoalbuminemia / adult-onset ataxia with oculomotor apraxia (#208920) (Date 2001, Moreira 2001) |                                                                                                                                                                                                                                           | AR                                 |               |
| <i>ARL13B</i>           | *608922 | JBTS8: Joubert syndrome type 8 (#612291) (Cantagrel 2008)                                                                                             |                                                                                                                                                                                                                                           | AR                                 |               |
| <i>ARL6IP1</i>          | *607669 | ?SPG61: autosomal recessive spastic paraplegia type 61 (#615685) (Novarino 2014)                                                                      |                                                                                                                                                                                                                                           | AR                                 |               |
| <i>ARSI</i>             | *610009 | ?SPG66 (Novarino 2014)                                                                                                                                |                                                                                                                                                                                                                                           | AR                                 |               |
| <i>ATCAY</i>            | *608179 | Cayman type cerebellar ataxia (#601238) (Bomar 2003)                                                                                                  |                                                                                                                                                                                                                                           | AR                                 |               |
| <i>ATLI</i>             | *606439 | SPG3A: autosomal dominant spastic paraplegia type 3A (#182600) (Zhao 2001)                                                                            | Hereditary Sensory Neuropathy Type 1D (#613708) (Guelly 2011)                                                                                                                                                                             | AD / AR (homozygous in 2 families) |               |
| <i>ATM</i>              | *607585 | Ataxia-telangiectasia (#208900) (Savitsky 1995)                                                                                                       | Adult-onset ataxia / distal spinal muscular atrophy with little ataxia                                                                                                                                                                    | AR                                 |               |
| <i>ATP13A2</i>          | *610513 | PARK9: Rufor-Kabed syndrome (#606693) (Ramirez 2006)                                                                                                  | Ceroid lipofuscinosis type 12 (#606693) (Bras 2012)                                                                                                                                                                                       | AR                                 |               |
| <i>ATP7B</i>            | *606882 | Wilson disease (#277900) (Bull 1993, Tanzi 1993)                                                                                                      |                                                                                                                                                                                                                                           | AR                                 |               |
| <i>ATXN10</i>           | *611150 | Spinocerebellar ataxia 10 (#603516) (Matsuura 2000)                                                                                                   | Joubert syndrome (Sang 2011)                                                                                                                                                                                                              | AD                                 |               |
| <i>B4GALNT1</i>         | *601873 | SPG26: autosomal recessive spastic paraplegia type 26 (#609195) (Boukhris 2013)                                                                       |                                                                                                                                                                                                                                           | AR                                 |               |
| <i>BICD2</i>            | *609797 | Lower extremity-predominant spinal muscular atrophy-2 (#615290) (Neveling 2013)                                                                       | HSP (Oates 2013)                                                                                                                                                                                                                          | AD                                 |               |
| <i>BSC12</i>            | *606158 | Congenital generalized lipodystrophy type 2 (# 269700) (AR) (Magre 2001)                                                                              | Distal hereditary motor neuropathy type VA (#600794) (AD) / SPG17: Silver spastic paraplegia syndrome (# 270685) (AD) (Windpassinger 2004) // Progressive encephalopathy with-without lipodystrophy (#615924) (AR) (Guillen-Navarro 2013) | AR (lipodystrophy) / AD (HSP)      |               |

| Gene Symbol (continued) | OMIM #  | Original phenotype                                                                                                       | Phenotypic extension                                                                                                                                                                                                   | Transmission mode | ADCA analysis |
|-------------------------|---------|--------------------------------------------------------------------------------------------------------------------------|------------------------------------------------------------------------------------------------------------------------------------------------------------------------------------------------------------------------|-------------------|---------------|
| <i>C10orf2</i>          | *606075 | PEOA3: Progressive external ophthalmoplegia with mitochondrial DNA deletions (#609286) (AD) (Spelbrink 2001)             | Mitochondrial DNA depletion syndrome type 7 (hepatocerebral) = infantile onset spinocerebellar ataxia (IOSCA) (#271245) (AR) (Nikali 2005) / Perrault syndrome type 5 (#616138) (AR) (Morino 2014)                     | AD / AR           |               |
| <i>C12orf65</i>         | *613541 | COXPD7: Combined oxidative phosphorylation deficiency (#613559) (AR) (Antonicka 2010)                                    | SPG55: spastic paraplegia type 55 (#615035) (Shimazaki 2012)                                                                                                                                                           | AR                |               |
| <i>C19orf12</i>         | *614297 | Neurodegeneration with brain iron accumulation type 4 (#614298) (Hartig 2011)                                            | SPG43: spastic paraplegia type 43 (# 615043) (Landouere 2013)                                                                                                                                                          | AR                |               |
| <i>C5orf42</i>          | *614571 | Joubert syndrome-17 (#614615) (Srouf 2012)                                                                               | Orofaciodigital syndrome VI (#277170) (Lopez 2014)                                                                                                                                                                     | AR                |               |
| <i>CACNA1A</i>          | *601011 | Episodic ataxia type 2 (#108500) / Familial hemiplegic migraine (#141500) (Ophoff 1996)                                  | Spinocerebellar ataxia type 6 (#183086) (Zhuchenko 1997)                                                                                                                                                               | AD                | Yes           |
| <i>CACNA1G</i>          | *604065 | Spinocerebellar ataxia (Coutelier 2015)                                                                                  |                                                                                                                                                                                                                        | AD                | Yes           |
| <i>CACNB4</i>           | *601949 | Episodic ataxia type 5 (#613855) / susceptibility to epilepsy (juvenile myoclonic / generalized )(#607682) (Escayg 2000) |                                                                                                                                                                                                                        | AD                | Yes           |
| <i>CC2D2A</i>           | *612013 | Joubert syndrome type 9 (#612285) (Noor 2008)                                                                            | Meckel syndrome type 6 (#612284) (Tallila 2008) / COACH syndrome: cerebellar vermis hypo/aplasia, oligophrenia, congenital ataxia, ocular coloboma, hepatic fibrosis (#216360) (Gorden 2008, Doherty 2010) - continuum | AR / digenic      |               |
| <i>CCDC88C</i>          | *611204 | Autosomal recessive nonsyndromic hydrocephalus (#236600) (Ekici 2010)                                                    | Spinocerebellar ataxia type 40 (#616053) (Tsoi 2014)                                                                                                                                                                   | AR / AD           |               |
| <i>CCT5</i>             | *610150 | Hereditary sensory neuropathy with spastic paraplegia (#256840) (Bouhouche 2006)                                         |                                                                                                                                                                                                                        | AR                |               |
| <i>CEP290</i>           | *610142 | Joubert syndrome type 5 (#610188) / Senior-Loken syndrome (610189) (Sayer 2006)                                          | Wide continuum, no clear genotype-phenotype correlation: Leber congenital amaurosis 10 (#611755), Meckel syndrome 4 (#611134), ?Bardet-Biedl syndrome 14 (#615991)                                                     | AR / digenic      |               |
| <i>CEP41</i>            | *610523 | Joubert syndrome type 15 (#614464) (Lee 2012)                                                                            |                                                                                                                                                                                                                        | AR / digenic      |               |
| <i>CISD2</i>            | *611507 | Wolfram syndrome type 2 (#604928) (Amr 2007)                                                                             |                                                                                                                                                                                                                        | AR                |               |
| <i>CLCN2</i>            | *600570 | Leukoencephalopathy with ataxia (#615651) (Depienne 2013)                                                                |                                                                                                                                                                                                                        | AR                |               |

| Gene Symbol (continued) | OMIM #  | Original phenotype                                                                                   | Phenotypic extension                                                                                                                  | Transmission mode | ADCA analysis |
|-------------------------|---------|------------------------------------------------------------------------------------------------------|---------------------------------------------------------------------------------------------------------------------------------------|-------------------|---------------|
| <i>CLN5</i>             | *608102 | Neuronal ceroid lipofuscinosis-5 (#256731) (Savukoski 1998)                                          | Late onset ataxia and progressive cognitive impairment (Mancini 2015)                                                                 | AR                |               |
| <i>CLN6</i>             | *606725 | Neuronal ceroid lipofuscinosis-6 (#601780) (Gao 2002)                                                | Kufs disease = neuronal ceroid lipofuscinosis-4A (#204300) (Arsov 2011)                                                               | AR                |               |
| <i>CLPP</i>             | *601119 | Perrault syndrome 3 (#614129) (Jenkinson 2013)                                                       |                                                                                                                                       | AR                |               |
| <i>COASY</i>            | *609855 | Neurodegeneration with brain iron accumulation type 6 (#615643) (Dusi 2014)                          |                                                                                                                                       | AR                |               |
| <i>COL18A1</i>          | *120328 | Knobloch syndrome 1 (#267750) (Sertie 2000)                                                          | Ataxia + epilepsy + eye disorder, still called Knobloch syndrome (Paisan-Ruiz 2009) (same frameshift mutation as one Knobloch family) | AR                |               |
| <i>COQ2</i>             | *609825 | Coenzyme Q10 deficiency-1 (#607426) (Quinzii 2006)                                                   | NB : high clinical heterogeneity in COQ10D                                                                                            | AR                |               |
| <i>COQ9</i>             | *612837 | Coenzyme Q10 deficiency-5 (#614654) (Duncan 2009)                                                    |                                                                                                                                       | AR                |               |
| <i>COX20</i>            | *614698 | Mitochondrial complex IV deficiency (#220110) (Szklaarczyk 2013)                                     |                                                                                                                                       | AR                |               |
| <i>CP</i>               | *117700 | Aceruloplasminemia, hemosiderosis, ataxia (#604290) (Yoshida 1995)                                   | Hypoceruloplasminemia and ataxia (AD) (Miyajima 2001)                                                                                 | AR / AD           |               |
| <i>CSPP1</i>            | *611654 | Joubert syndrome type 21 (#615636) (Tuz 2014 / Akizu 2014)                                           | Wide phenotypic variation, some with features reminiscent of Meckel syndrome and Jeune Asphyxiating Thoracic Dystrophy                | AR                |               |
| <i>CSTB</i>             | *601145 | Progressive myoclonus epilepsy 1A (Unverricht Lundborg) (#254800) (Pennacchio 1996, Lafreniere 1997) |                                                                                                                                       | AR                |               |
| <i>CTDP1</i>            | *604927 | Congenital cataracts, facial dysmorphism, and neuropathy (#604168) (Varon 2003)                      | = variant of Marinesco Sjögren (neuromuscular)                                                                                        | AR                |               |
| <i>CTSD</i>             | *116840 | Ceroid lipofuscinosis 10 (#610127) (Steinfeld 2006)                                                  |                                                                                                                                       | AR                |               |
| <i>CWF19L1</i>          | *616120 | Autosomal recessive spinocerebellar ataxia 17 (SCAR17) (#616127) (Burns 2014)                        |                                                                                                                                       | AR                |               |
| <i>CYP2U1</i>           | *610670 | SPG56/49: autosomal recessive spastic paraplegia type 56/49 (#615030) (Tesson 2012)                  |                                                                                                                                       | AR                |               |
| <i>CYP7B1</i>           | *603711 | Congenital bile acid synthesis defect 3 (#613812) (Setchell 1998)                                    | SPG5: spastic paraplegia type 5 (#270800) (Tsaousidou                                                                                 | AR                |               |

| Gene Symbol<br>(continued) | OMIM #  | Both enzymes affected?<br><br>Original phenotype                                                                 | 2008)<br><br>Phenotypic extension                                                                                                                       | Transmission<br>mode | ADCA<br>analysis |
|----------------------------|---------|------------------------------------------------------------------------------------------------------------------|---------------------------------------------------------------------------------------------------------------------------------------------------------|----------------------|------------------|
| <i>DARS2</i>               | *610956 | Leukoencephalopathy with brainstem and spinal cord involvement and lactate elevation (#611105) (Scheper 2007)    |                                                                                                                                                         | AR                   |                  |
| <i>DCAF17</i>              | *612515 | Woodhouse-Sakati syndrome (#241080) (Alazami 2008)                                                               |                                                                                                                                                         | AR                   |                  |
| <i>DDB2</i>                | *600811 | XPE: Xeroderma pigmentosum group E (#278740) (Nichols 1996)                                                      |                                                                                                                                                         | AR                   |                  |
| <i>DDHD1</i>               | *614603 | SPG28: autosomal recessive spastic paraplegia type 28 (#609340) (Tesson 2012)                                    |                                                                                                                                                         | AR                   |                  |
| <i>DDHD2</i>               | *615003 | SPG54: autosomal recessive spastic paraplegia type 54 (#615033) (Schuurs-Hoeijmakers 2012)                       | Late-onset spastic ataxia (Doi 2014)                                                                                                                    | AR                   |                  |
| <i>DNAJC19</i>             | *608977 | 3-methylglutaconic aciduria type V (#610198) (Davey 2006)                                                        |                                                                                                                                                         | AR                   |                  |
| <i>DNAJC3</i>              | *601184 | Combined cerebellar and peripheral ataxia with hearing loss and diabetes mellitus (#616192) (Synofzik 2014)      |                                                                                                                                                         |                      |                  |
| <i>DNMT1</i>               | *126375 | Hereditary sensory neuropathy type IE (#614116) (Klein 2011)                                                     | Cerebellar ataxia, deafness, narcolepsy (#604121) (Winkelmann 2012)                                                                                     | AD                   | Yes              |
| <i>EEF2</i>                | *130610 | Spinocerebellar ataxia 26 (#609306) (Hekman 2012)                                                                |                                                                                                                                                         | AD                   | Yes              |
| <i>EIF2B1</i>              | *606686 | Leukoencephalopathy with vanishing white matter (#603896) (van der Knaap 2002)                                   |                                                                                                                                                         | AR                   |                  |
| <i>EIF2B2</i>              | *606454 | Leukoencephalopathy with vanishing white matter (#603896) (Leegwater 2001)                                       | Ovarioleukodystrophy (#603896)                                                                                                                          | AR                   |                  |
| <i>EIF2B3</i>              | *606273 | Leukoencephalopathy with vanishing white matter (#603896) (van der Knaap 2002)                                   |                                                                                                                                                         | AR                   |                  |
| <i>EIF2B4</i>              | *606687 | Leukoencephalopathy with vanishing white matter (#603896) (van der Knaap 2002)                                   | Ovarioleukodystrophy (#603896)                                                                                                                          | AR                   |                  |
| <i>EIF2B5</i>              | *603945 | Leukoencephalopathy with vanishing white matter (#603896) (Leegwater 2001) (most frequent gene, 2/3 of patients) | Ovarioleukodystrophy (#603896)                                                                                                                          | AR                   |                  |
| <i>ELOVL4</i>              | *605512 | Stargardt macular dystrophy (AD) (#600110) (Zhang 2001)                                                          | Ichthyosis, spastic quadriplegia, and mental retardation (AR) (#614457) (Aldahmesh 2011) / Spinocerebellar ataxia-34 (AD) (#133190) (Cadieux-Dion 2014) | AD / AR              | Yes              |

| Gene Symbol (continued) | OMIM #  | Original phenotype                                                                                      | Phenotypic extension                                                                                                                                                       | Transmission mode | ADCA analysis |
|-------------------------|---------|---------------------------------------------------------------------------------------------------------|----------------------------------------------------------------------------------------------------------------------------------------------------------------------------|-------------------|---------------|
| <i>ELOVL5</i>           | *611805 | Spinocerebellar ataxia 38 (#615957) (Di Gregorio 2014)                                                  |                                                                                                                                                                            | AD                | Yes           |
| <i>ENTPD1</i>           | *601752 | SPG64: autosomal recessive spastic paraplegia type 64 (#615680) (Novarino 2014)                         | Regulation of immune cell levels                                                                                                                                           | AR                |               |
| <i>EPM2A</i>            | *607566 | Progressive myoclonus epilepsy 2A (Lafora) (#254780) (Minassian 1998)                                   |                                                                                                                                                                            | AR                |               |
| <i>ERCC2</i>            | *126340 | XPD: Xeroderma pigmentosum group D (#278730) (Frederick 1994)                                           | TTD1: Trichothiodystrophy-1 (#601675) (Botta 1998) / COFS: Cerebrooculofacioskeletal syndrome-2 (#610756) (Graham 2001)                                                    | AR                |               |
| <i>ERCC3</i>            | *133510 | XPB: Xeroderma pigmentosum group B (# 610651) (Weeda 1990, Oh 2006) / Cockayne syndrome features        | TTD2: Trichothiodystrophy (#616390) (Weeda 1997)                                                                                                                           | AR                |               |
| <i>ERCC4</i>            | *133520 | XPF: Xeroderma pigmentosum group F (#278760) (Sijbers 1996) / Cockayne syndrome features                | Fanconi anemia group Q (#615272) (Kashiyama 2013) / XFE progeroid syndrome (#610965) (Niederhofer 2006) (linked to ICL repair defect)                                      | AR                |               |
| <i>ERCC5</i>            | *133530 | XPG: Xeroderma pigmentosum group G (#278780) (Nouspikel and Clarkson 1994) / Cockayne syndrome features | Cerebrooculofacioskeletal syndrome-3 (#616570) (Nouspikel 1997)                                                                                                            | AR                |               |
| <i>ERCC6</i>            | *609413 | Cockayne syndrome type B (#133540) (Mallory 1998)                                                       | De Sanctis-Cacchione syndrome (#278800) (Colella 2000) // UV-sensitive syndrome-1 (#600630) (Horibata 2004) // Cerebrooculofacioskeletal Syndrome 1 (#214150) (Meira 2000) | AR                |               |
| <i>ERCC8</i>            | *609412 | Cockayne syndrome A (#216400) (Henning 1995)                                                            | UV-sensitive syndrome-2 (#614621) (Nardo 2009)                                                                                                                             | AR                |               |
| <i>ERLIN1</i>           | *611604 | SPG62: autosomal recessive spastic paraplegia type 62 (no OMIM #) (Novarino 2014)                       |                                                                                                                                                                            | AR                |               |
| <i>ERLIN2</i>           | *611605 | SPG18: autosomal recessive spastic paraplegia type 18 (#611225) (Alazami 2011)                          | Primary lateral sclerosis                                                                                                                                                  | AR                |               |
| <i>ETFDH</i>            | *231675 | Glutaric acidemia IIC = multiple acyl-CoA dehydrogenase deficiency (#231680) (Beard 1993)               | Neonatal-onset form with congenital anomalies (type I), neonatal-onset form without congenital anomalies (type II), late-onset form (type III)                             | AR                |               |
| <i>EXOC8</i>            | *615283 | ?Joubert syndrome (Dixon-Salazar 2012)                                                                  |                                                                                                                                                                            | AR                |               |
| <i>EXOSC3</i>           | *606489 | Pontocerebellar hypoplasia, type 1B (#614678) (Wan 2012)                                                | Milder spastic paraplegia with mild intellectual impairment phenotype (Zanni 2013)                                                                                         | AR                |               |
| <i>FA2H</i>             | *611026 | SPG35: autosomal recessive spastic paraplegia type 35 (#612319) (Edvardson 2008)                        |                                                                                                                                                                            | AR                |               |

| Gene Symbol (continued) | OMIM #  | Original phenotype                                                                                          | Phenotypic extension                                                                                                                                                                                                                                                                                                               | Transmission mode | ADCA analysis |
|-------------------------|---------|-------------------------------------------------------------------------------------------------------------|------------------------------------------------------------------------------------------------------------------------------------------------------------------------------------------------------------------------------------------------------------------------------------------------------------------------------------|-------------------|---------------|
| <i>FGF14</i>            | *601515 | Spinocerebellar ataxia 27 (#609307) (van Swieten 2003)                                                      |                                                                                                                                                                                                                                                                                                                                    | AD                | Yes           |
| <i>FLRT1</i>            | *604806 | SPG68: autosomal recessive spastic paraplegia type 68 (Novarino 2014)                                       |                                                                                                                                                                                                                                                                                                                                    | AR                |               |
| <i>FLVCR1</i>           | *609144 | Posterior column ataxia with retinitis pigmentosa (#609033) (Rajadhyaksha 2010)                             |                                                                                                                                                                                                                                                                                                                                    | AR                |               |
| <i>FTL</i>              | *134790 | Hyperferritinemia-Cataract syndrome (#600886) (Beaumont 1995)                                               | Neurodegeneration with Brain Iron Accumulation type 3 (#606159) (Curtis 2001)/ L-ferritin deficiency (#615604) (Cremonesi 2004)                                                                                                                                                                                                    | AD / AR           |               |
| <i>FXN</i>              | *606829 | Friedreich ataxia (#229300) (Delatycki 1999)                                                                |                                                                                                                                                                                                                                                                                                                                    | AR                |               |
| <i>GAD1</i>             | *605363 | Spastic quadriplegic cerebral palsy 1 (CPSQ1) (#603513) (Lynex 2004)                                        |                                                                                                                                                                                                                                                                                                                                    | AR                |               |
| <i>GBA2</i>             | *609471 | SPG46: autosomal recessive spastic paraplegia type 46 (#614409) (Martin 2013, Hammer 2013)                  |                                                                                                                                                                                                                                                                                                                                    | AR                |               |
| <i>GJA1</i>             | *121014 | Hypoplastic left heart syndrome type 1 (#241550), atrioventricular canal defect (#600309) (Dasgupta 2001)   | Oculodentodigital dysplasia (AD, #164200) (AR, #257850) (Paznekas 2003) / Syndactyly type III (#186100) (Richardson 2004) / Craniometaphyseal dysplasia (#218400) (Hu 2013) / Palmoplantar keratoderma and congenital alopecia type 1 (#104100) (Wang 2015) / erythrokeratoderma variabilis et progressiva (#133200) (Boyden 2015) | AD / AR           |               |
| <i>GJC2</i>             | *608803 | Hypomyelinating leukodystrophy type 2 (#608804) = Pelizaeus-Merzbacher-Like disease type 1 (Uhlenberg 2004) | Spastic paraplegia type 44 (#613206) (Orthmann-Murphy 2009) / Hereditary lymphedema IC (#613480) (AD) (Ferrell 2010)                                                                                                                                                                                                               | AR / AD           |               |
| <i>GOSR2</i>            | *604027 | Progressive myoclonic epilepsy type 6 (#614018) (Corbett 2011)                                              |                                                                                                                                                                                                                                                                                                                                    | AR                |               |
| <i>GRID2</i>            | *602368 | Autosomal recessive spinocerebellar ataxia 18 (#616204) (Utine 2013, Hills 2013)                            | AD congenital to late-onset ataxia (Coutelier 2015)                                                                                                                                                                                                                                                                                | AR / AD           | Yes           |
| <i>GRM1</i>             | *604473 | Autosomal recessive spinocerebellar ataxia 13 (#614831) (Guergueltcheva 2012)                               |                                                                                                                                                                                                                                                                                                                                    | AR                |               |
| <i>HEXA</i>             | *606869 | Tay-Sachs disease (#272800) (Beutler 1975)                                                                  |                                                                                                                                                                                                                                                                                                                                    | AR                |               |



| Gene Symbol (continued) | OMIM #  | Original phenotype                                                                                                                                        | Phenotypic extension                                                                                                                                                                                                                                                             | Transmission mode | ADCA analysis |
|-------------------------|---------|-----------------------------------------------------------------------------------------------------------------------------------------------------------|----------------------------------------------------------------------------------------------------------------------------------------------------------------------------------------------------------------------------------------------------------------------------------|-------------------|---------------|
| <i>HEXB</i>             | *606873 | Sandhoff disease (#268800) (Bikker 1989)                                                                                                                  |                                                                                                                                                                                                                                                                                  | AR                |               |
| <i>HSD17B4</i>          | *601860 | D-bifunctional protein deficiency (#261515) (Suzuki 1997)                                                                                                 | Perrault syndrome type 1 (#233400) (Pierce 2010)                                                                                                                                                                                                                                 | AR                |               |
| <i>HSPD1</i>            | *118190 | Autosomal dominant spastic paraplegia type 13 (#605280) (Hansen 2002)                                                                                     | AR hypomyelinating leukodystrophy type 4 (#612233) (Magen 2008)                                                                                                                                                                                                                  | AD / AR           |               |
| <i>IFRD1</i>            | *603502 | ??Spinocerebellar ataxia 18 (#607458) (Brkanac 2009)                                                                                                      |                                                                                                                                                                                                                                                                                  | AD                | Yes           |
| <i>INPP5E</i>           | *613037 | Mental retardation, truncal obesity, retinal dystrophy, and micropenis syndrome (#610156) (Jacoby 2009) / Joubert syndrome type 1 (#213300) (Bielas 2009) |                                                                                                                                                                                                                                                                                  | AR                |               |
| <i>ITM2B</i>            | *603904 | Familial British dementia (Vidal 1999)                                                                                                                    | Familial Danish dementia (Vidal 2000); retinal dystrophy with inner retinal dysfunction and ganglion cell abnormalities (#616079) (Audo 2014)                                                                                                                                    | AD                | Yes           |
| <i>ITPR1</i>            | *147265 | Spinocerebellar ataxia 15 (#606658) (Van de Leemput 2007)                                                                                                 | Spinocerebellar ataxia 29, congenital nonprogressive (#117360) (Huang 2012)                                                                                                                                                                                                      | AD                | Yes           |
| <i>KCNA1</i>            | *176260 | Episodic ataxia / myokymia (#160120) (Browne 1994)                                                                                                        |                                                                                                                                                                                                                                                                                  | AD                | Yes           |
| <i>KCNC3</i>            | *176264 | Spinocerebellar ataxia 13 (#605259) (Waters 2006)                                                                                                         |                                                                                                                                                                                                                                                                                  | AD                | Yes           |
| <i>KCND3</i>            | *605411 | Brugada syndrome 9 (#616399) (Giudicessi 2011)                                                                                                            | Spinocerebellar ataxia 19-22 (#607346) (Lee 2012, Duarri 2012)                                                                                                                                                                                                                   | AD                | Yes           |
| <i>KCNJ10</i>           | *602208 | SESAME syndrome (seizures, sensorineural deafness, ataxia, mental retardation, and electrolyte imbalance) (#612780) (Scholl 2009)                         |                                                                                                                                                                                                                                                                                  | AR                |               |
| <i>KCTD7</i>            | *611725 | Progressive myoclonic epilepsy type 3 (#611726) (Van Bogaert 2007)                                                                                        | Pathologic findings of ceroid lipofuscinosis = CLN14                                                                                                                                                                                                                             | AR                |               |
| <i>KIAA0196</i>         | *610657 | Autosomal dominant spastic paraplegia type 8 (#603563) (Valdmanis 2007)                                                                                   | Ritscher-Schinzel syndrome-1 (#220210) (Elliott 2013)                                                                                                                                                                                                                            | AD / AR           |               |
| <i>KIAA0226</i>         | *613516 | Autosomal recessive spinocerebellar ataxia type 15 (#615705) (Assoum 2010)                                                                                |                                                                                                                                                                                                                                                                                  | AR                |               |
| <i>KIF1A</i>            | *601255 | SPG30: autosomal recessive spastic paraplegia type 30 (#610357) (Erlich 2011)                                                                             | Hereditary sensory neuropathy type IIC (AR) (#614213) (Riviere 2011) / Nonsyndromic intellectual disability (AD) (#614255) (Hamdan 2011) / ID with variable symptoms (Lee 2015) / Progressive encephalopathy with edema, hysarrhythmia and optic atrophy syndrome (AD) (#260565) | AR / AD           |               |

| <b>Gene Symbol (continued)</b> | <b>OMIM #</b> | <b>Original phenotype</b>                                                                                  | <b>Phenotypic extension</b>                                                                          | <b>Transmission mode</b> | <b>ADCA analysis</b> |
|--------------------------------|---------------|------------------------------------------------------------------------------------------------------------|------------------------------------------------------------------------------------------------------|--------------------------|----------------------|
| <i>KIF1C</i>                   | *603060       | Spastic ataxia 2 (#611302) (Dor 2014)= spastic paraplegia 58 (Novarino 2014)                               |                                                                                                      | AR                       |                      |
| <i>KIF5A</i>                   | *602821       | SPG10: autosomal dominant spastic paraplegia type 10 (#604187) (Reid 2002)                                 | Charcot-Marie-Tooth type 2                                                                           | AD                       |                      |
| <i>KIF7</i>                    | *611254       | Acrocallosal syndrome (AR) (#200990) (Putoux 2011) / Hydrolethalus syndrome 2 (AR) (#614120) (Putoux 2011) | Joubert syndrome 12 (AR) (#200990) (Dafinger 2011)                                                   | AR                       |                      |
| <i>LICAM</i>                   | *308840       | X-linked hydrocephalus (#307000) (Rosenthal 1992)                                                          | X-linked spastic paraplegia type 1, MASA syndrome, CRASH syndrome (#303350) (Jouet 1994)             | X-linked                 |                      |
| <i>LAMA1</i>                   | *150320       | Poretti-Boltshauser syndrome (#615960), (Aldinger 2014)                                                    |                                                                                                      | AR                       |                      |
| <i>LYST</i>                    | *606897       | Chediak-Higashi syndrome (#214500) (Nagle 1996)                                                            | Complicated spastic paraplegia (no OMIM, much milder) (2014)                                         | AR                       |                      |
| <i>MAG</i>                     | *159460       | Autosomal recessive spastic paraplegia type 75 (#616680) (Novarino 2014)                                   |                                                                                                      | AR                       |                      |
| <i>MARS</i>                    | *156560       | Interstitial lung and liver disease (#615486) (Van Meel 2013)                                              | Charcot-Marie-Tooth type 2U (#616280) (Gonzalez 2013) (AD) / Spastic paraplegia (AR) (Novarino 2014) | AR / AD                  |                      |
| <i>MARS2</i>                   | *609728       | Autosomal recessive spastic ataxia type 3 (#611390) (Bayat 2012)                                           | Combined oxidative phosphorylation deficiency-25 (#616430) (Webb 2015)                               | AR                       |                      |
| <i>MRE11A</i>                  | *600814       | Ataxia-telangiectasia-like disorder (#604391) (Stewart 1999)                                               |                                                                                                      | AR                       |                      |
| <i>NDUFAF2</i>                 | *609653       | Mitochondrial complex I deficiency (#252010) (Ogilvie 2005)                                                | Leigh syndrome (#256000) (Calvo 2010)                                                                | AR                       |                      |
| <i>NIPA1</i>                   | *608145       | Autosomal dominant spastic paraplegia type 6 (#600363) (Rainier 2003)                                      |                                                                                                      | AD                       |                      |
| <i>NKX2-1</i>                  | *600635       |                                                                                                            |                                                                                                      |                          |                      |
| <i>NOL3</i>                    | *605235       | Familial cortical myoclonus (#614937) (Russell 2012)                                                       |                                                                                                      | AD                       | Yes                  |
| <i>NPHP1</i>                   | *607100       | Juvenile nephronoptosis (#256100) (Konrad 1996)                                                            | Senior-Loken syndrome (#266900) (Caridi 1998) / Joubert syndrome (#213300) (Parisi 2004)             | AR                       |                      |

| <b>Gene Symbol (continued)</b> | <b>OMIM #</b> | <b>Original phenotype</b>                                                                                                                                                                 | <b>Phenotypic extension</b>                                                                                                                                                     | <b>Transmission mode</b> | <b>ADCA analysis</b> |
|--------------------------------|---------------|-------------------------------------------------------------------------------------------------------------------------------------------------------------------------------------------|---------------------------------------------------------------------------------------------------------------------------------------------------------------------------------|--------------------------|----------------------|
| <i>NT5C2</i>                   | *600417       | Autosomal recessive spastic paraplegia type 45 (#613162) (Novarino 2014)                                                                                                                  |                                                                                                                                                                                 | AR                       |                      |
| <i>OFD1</i>                    | *300170       | Oral-facial-digital syndrome 1 (#311200) (Ferrante 2001)                                                                                                                                  | Simpson-Golabi-Behmel Syndrome Type 2 (#300209) (Budny 2006) / Joubert syndrome 10 (#300804) (Coene 2009); Retinitis pigmentosa 23 (#300424) (Webb 2012)                        | XLD / XLR                |                      |
| <i>OPA1</i>                    | *605290       | Optic atrophy 1 (#165500)                                                                                                                                                                 | Optic atrophy plus syndrome (#125250)                                                                                                                                           | AD                       | Yes                  |
| <i>PANK2</i>                   | *606157       | Neurodegeneration with brain iron accumulation 1 (#243200) (Zhou 2001)                                                                                                                    | HARP syndrome (#607236) (Ching 2002)                                                                                                                                            | AR                       |                      |
| <i>PCNA</i>                    | *176740       | Ataxia-telangiectasia-like disorder 2(#615919)(Baple 2014)                                                                                                                                |                                                                                                                                                                                 | AR                       |                      |
| <i>PDE6D</i>                   | *602676       | Joubert syndrome type 22 (#615665) (Thomas 2014)                                                                                                                                          |                                                                                                                                                                                 | AR                       |                      |
| <i>PDYN</i>                    | *131340       | Spinocerebellar ataxia type 23 (#610245) (Bakalkin 2010)                                                                                                                                  |                                                                                                                                                                                 | AD                       | Yes                  |
| <i>PEX10</i>                   | *602859       | Peroxisome biogenesis disorder 6A (Zellweger) (#614870), peroxisome biogenesis disorder 6B (#614871) (Warren 1998)                                                                        |                                                                                                                                                                                 | AR                       |                      |
| <i>PGAP1</i>                   | *611655       | Autosomal recessive mental retardation 42 (#615802)(Murakami 2014)                                                                                                                        | Spastic paraplegia type 67 (Novarino 2014)                                                                                                                                      | AR                       |                      |
| <i>PIK3R5</i>                  | *611317       | Ataxia-oculomotor apraxia type 3 (#615217) (Al Tassan 2012)                                                                                                                               |                                                                                                                                                                                 | AR                       |                      |
| <i>PLA2G6</i>                  | *603604       | Neurodegeneration with brain iron accumulation 2A = infantile neuroaxonal dystrophy (#256600); Neurodegeneration with brain iron accumulation 2B = Karak syndrome (#610217) (Morgan 2006) | Parkinson disease 14 (dystonia-parkinsonism) (#612953) (Paisan-Ruiz 2009)                                                                                                       | AR                       |                      |
| <i>PLP1</i>                    | *300401       | Pelizaeus-Merzbacher disease (#312080) (Cremers 1987)                                                                                                                                     | Spastic paraplegia type 2 (#312920) (Saugier-Verber 1994)                                                                                                                       | XLR                      |                      |
| <i>PMM2</i>                    | *601785       | Congenital disorder of glycosylation, type Ia (#212065) (Matthijs 1997)                                                                                                                   |                                                                                                                                                                                 | AR                       |                      |
| <i>PNPLA6</i>                  | *603197       | SPG39: autosomal recessive spastic paraplegia type 39 (#612020) (Rainier 2008)                                                                                                            | Boucher-Neuhauser syndrome (#215470) / Gordon-Homes syndrome (#212840) (Synofzik 2014) / Oliver-McFarlane syndrome (#275400) / Laurence-Moon syndrome (#245800) (Hufnagel 2014) | AR                       |                      |

| Gene Symbol (continued) | OMIM #  | Original phenotype                                                                                                            | Phenotypic extension                                                                                                                                                                                                                                | Transmission mode                  | ADCA analysis |
|-------------------------|---------|-------------------------------------------------------------------------------------------------------------------------------|-----------------------------------------------------------------------------------------------------------------------------------------------------------------------------------------------------------------------------------------------------|------------------------------------|---------------|
| <i>POLG</i>             | *174763 | Progressive external ophthalmoplegia dominant (#157640) / recessive (#258450) (Van Goethem 2001)                              | Sensory Ataxic Neuropathy, Dysarthria and Ophthalmoparesis (SANDO) (#607459) (Van Goethem 2003) / mitochondrial DNA depletion syndrome type 4A (#203700) (Naviaux 2004) / mitochondrial DNA depletion syndrome type 4B (#613662) (Van Goethem 2003) | AD / AR                            | Yes           |
| <i>POLR3A</i>           | *614258 | Hypomyelinating leukodystrophy 7, with or without oligodontia and / or hypogonadotropic hypogonadism (#607694) (Bernard 2011) |                                                                                                                                                                                                                                                     | AR                                 |               |
| <i>POLR3B</i>           | *614366 | Hypomyelinating leukodystrophy 8, with or without oligodontia and / or hypogonadotropic hypogonadism (#614381) (Saito 2011)   |                                                                                                                                                                                                                                                     | AR                                 |               |
| <i>PRICKLE1</i>         | *608500 | Progressive myoclonic epilepsy 1B (#612437) (Bassuk 2008)                                                                     |                                                                                                                                                                                                                                                     | AR / ?AD                           |               |
| <i>PRKCG</i>            | *176980 | Spinocerebellar ataxia type 14 (#605361) (Chen 2003)                                                                          | Intellectual disability with ataxia (Najmabadi 2011)                                                                                                                                                                                                | AD / semidominant (Asai 2009) / AR | Yes           |
| <i>RAB3GAP2</i>         | *609275 | Martsolf syndrome (#212720) (Aligianis 2006)                                                                                  | Warburg micro syndrome 2 (#614225) (Borck 2011) / spastic paraplegia (Novarino 2014)                                                                                                                                                                | AR                                 |               |
| <i>REEP1</i>            | *609139 | SPG31: autosomal dominant spastic paraplegia type 31 (#610250) (Zuchner 2006)                                                 | Autosomal dominant distal hereditary motor neuronopathy type VB (#614751) (Beetz 2012) / ?Spinal muscular atrophy with respiratory distress (AR) (#604320) (?Schottmann 2015)                                                                       | AD / ?AR                           | Yes           |
| <i>REEP2</i>            | *609347 | SPG72: spastic paraplegia type 72 (#615625) (Esteves 2014)                                                                    |                                                                                                                                                                                                                                                     | AD / AR                            |               |
| <i>RNF216</i>           | *609948 | Gordon Holmes syndrome (#212840) (Margolin 2013)                                                                              | Huntington-like disorder (Santens 2015)                                                                                                                                                                                                             | AR                                 |               |
| <i>RPGRIP1L</i>         | *610937 | Joubert syndrome 7 (#611560) / Meckel syndrome 5 (#611561) (Delous 2007)                                                      | COACH syndrome (#216360) (Doherty 2010)                                                                                                                                                                                                             | AR                                 |               |
| <i>RTN2</i>             | *603183 | SPH12: autosomal dominant spastic paraplegia type 12 (#604805) (Montenegro 2012)                                              |                                                                                                                                                                                                                                                     | AD                                 |               |
| <i>SACS</i>             | *604490 | Spastic ataxia of Charlevoix-Saguenay (#270550) (Engert 2000)                                                                 |                                                                                                                                                                                                                                                     | AR                                 |               |
| <i>SCARB2</i>           | *602257 | Progressive myoclonic epilepsy type 4, with or without renal failure (#254900) (Berkovic 2008)                                |                                                                                                                                                                                                                                                     | AR                                 |               |

| Gene Symbol (continued) | OMIM #  | Original phenotype                                                                                                    | Phenotypic extension                                                                                                                                                                  | Transmission mode | ADCA analysis |
|-------------------------|---------|-----------------------------------------------------------------------------------------------------------------------|---------------------------------------------------------------------------------------------------------------------------------------------------------------------------------------|-------------------|---------------|
| <i>SETX</i>             | *608465 | Autosomal recessive spinocerebellar 1 (SCAR1) = Ataxia with oculomotor apraxia 2 (AOA2) (AR) (#606002) (Moreira 2004) | Juvenile Amyotrophic Lateral Sclerosis 4 (AD) (#602433) (Chen 2004) / Distal motor neuropathy with upper motor neuron signs                                                           | AR / AD           |               |
| <i>SIL1</i>             | *608005 | Marinesco-Sjogren syndrome (#248800) (Anttonen 2005)                                                                  |                                                                                                                                                                                       | AR                |               |
| <i>SLC16A2</i>          | *300095 | Allan-Herndon-Dudley syndrome= spastic paraplegia 22 (#300523) (Dumitrescu 2004)                                      |                                                                                                                                                                                       | XLR               |               |
| <i>SLC17A5</i>          | *604322 | Sialic acid storage disease, infantile (#269920); Salla disease (adult form) (#604369) (Verheijen 1999)               |                                                                                                                                                                                       | AR                |               |
| <i>SLC1A3</i>           | *600111 | Episodic ataxia type 6 (#612656) (Jen 2005)                                                                           |                                                                                                                                                                                       | AD                | Yes           |
| <i>SLC25A15</i>         | *603861 | Hyperornithinemia-hyperammonemia-homocitrullinemia syndrome (#238970) (Camacho 1999)                                  |                                                                                                                                                                                       | AR                |               |
| <i>SLC33A1</i>          | *603690 | Autosomal dominant spastic paraplegia 42 (#612539) (Lin 2008)                                                         | Autosomal recessive congenital cataracts, hearing loss and neurodegeneration (#614482) (Huppke 2012)                                                                                  | AD / AR           |               |
| <i>SLC9A1</i>           | *107310 | Lichtenstein-Knorr syndrome (#616291) (Guissart 2015)                                                                 | ?[spastic diplegia, autism, seizures, intellectual disability, and behavioral problems] (Zhu 2015) (het de novo missense)                                                             | AR                |               |
| <i>SNX14</i>            | *616105 | Autosomal recessive spinocerebellar ataxia type 20 (#616354) (Thomas 2014)                                            |                                                                                                                                                                                       | AR                |               |
| <i>SPAST</i>            | *604277 | SPG4: autosomal dominant spastic paraplegia type 4 (#182601) (Hazan 1999)                                             | AR-like to codominant transmission (Chinnery 2004, Lindsey 2000, Pantakani 2008)                                                                                                      | AD / AR           |               |
| <i>SPG11</i>            | *610844 | SPG11: autosomal recessive spastic paraplegia type 11 (#604360) (Stevanin 2007)                                       | Autosomal recessive juvenile-onset amyotrophic lateral sclerosis-5 (#602099) (Orlacchio 2010) / Autosomal recessive Charcot-Marie-Tooth disease type 2X (#616668) (Montecchiani 2016) | AR                |               |
| <i>SPG20</i>            | *607111 | SPG20: autosomal recessive spastic paraplegia type 20 = Troyer syndrome (#275900) (Patel 2002)                        |                                                                                                                                                                                       | AR                |               |
| <i>SPG21</i>            | *608181 | Autosomal recessive spastic paraplegia type 21 = MAST syndrome (#248900) (Simpson 2003)                               |                                                                                                                                                                                       | AR                |               |
| <i>SPG7</i>             | *602783 | SPG7: autosomal recessive spastic paraplegia type 7 (#607259) (Casari 1998)                                           |                                                                                                                                                                                       | AR / AD           | Yes           |

| <b>Gene Symbol (continued)</b> | <b>OMIM #</b> | <b>Original phenotype</b>                                                                            | <b>Phenotypic extension</b>                                              | <b>Transmission mode</b> | <b>ADCA analysis</b> |
|--------------------------------|---------------|------------------------------------------------------------------------------------------------------|--------------------------------------------------------------------------|--------------------------|----------------------|
| <i>SPTBN2</i>                  | *604985       | Spinocerebellar ataxia type 5 (#600224) (Ikeda 2006)                                                 | Autosomal recessive spinocerebellar ataxia type 14 (#615386) (Lise 2012) | AD / AR                  | Yes                  |
| <i>SRD5A3</i>                  | *611715       | Congenital disorder of glycosylation type Iq (#612379) (Al Gazali 2008)                              |                                                                          | AR                       |                      |
| <i>STUB1</i>                   | *607207       | Autosomal recessive spinocerebellar ataxia type 16 (#615768) (Shi 2013)                              |                                                                          | AR                       | Yes                  |
| <i>SYNE1</i>                   | *608441       | Spinocerebellar ataxia type 8 (ARCA1, SCAR8) (#610743) (Gros-Louis 2007) (AR)                        | Emery-Dreifuss muscular dystrophy (#612998) (Zhang 2007) (AD)            | AR / AD                  |                      |
| <i>SYT14</i>                   | *610949       | Autosomal recessive spinocerebellar ataxia type 11 (#614229) (Doi 2011)                              |                                                                          | AR                       |                      |
| <i>TCTN1</i>                   | *609863       | Joubert syndrome type 13 (#614173) (Garcia-Gonzalo 2011)                                             |                                                                          | AR                       |                      |
| <i>TCTN2</i>                   | *613846       | Joubert syndrome type 24 (#616654) (Sang 2011), Meckel syndrome type 8 (#613885) (Shaheen 2011)      |                                                                          | AR                       |                      |
| <i>TCTN3</i>                   | *613847       | Joubert syndrome type 18 (#614815); orofaciogigatal syndrome IV (#258860) (Thomas 2012)              |                                                                          | AR                       |                      |
| <i>TDP1</i>                    | *607198       | Spinocerebellar ataxia with axonal neuropathy (#607250) (Takashima 2002)                             |                                                                          | AR                       |                      |
| <i>TDP2</i>                    | *605764       | Ataxia with epilepsy and mental retardation (Gomez-Herreros 2014)                                    |                                                                          | AR                       |                      |
| <i>TECPR2</i>                  | *615000       | Autosomal recessive spastic paraplegia type 49 (#615031) (Oz-Levi 2012)                              |                                                                          | AR                       |                      |
| <i>TFG</i>                     | *602498       | Hereditary motor and sensory neuropathy type Okinawa (#604484) (Ishiura 2012)                        | ?Autosomal recessive spastic paraplegia type 57 (#615658) (Beetz 2013)   | AD / ?AR                 |                      |
| <i>TGM6</i>                    | *613900       | Spinocerebellar ataxia type 35 (#613908) (Wang 2010)                                                 |                                                                          | AD                       | Yes                  |
| <i>TMEM138</i>                 | *614459       | Joubert syndrome type 16 (#614465) (Lee 2012)                                                        |                                                                          | AR                       |                      |
| <i>TMEM216</i>                 | *613277       | Joubert syndrome type 2 (#608091) (Edvardson 2010) / Meckel syndrome type 2 (#603194) (Valente 2010) |                                                                          | AR                       |                      |
| <i>TMEM231</i>                 | *614949       | Joubert syndrome type 20 (#614970) (Srouf 2012) / Meckel syndrome type 11 (#615397) (Shaheen 2013)   |                                                                          | AR                       |                      |

| Gene Symbol (continued) | OMIM #  | Original phenotype                                                                                    | Phenotypic extension                                                                                                                                                           | Transmission mode | ADCA analysis |
|-------------------------|---------|-------------------------------------------------------------------------------------------------------|--------------------------------------------------------------------------------------------------------------------------------------------------------------------------------|-------------------|---------------|
| <i>TMEM237</i>          | *614423 | Joubert syndrome type 14 (#614424) (Huang 2011)                                                       |                                                                                                                                                                                | AR                |               |
| <i>TMEM240</i>          | *616101 | Spinocerebellar ataxia type 21 (#607454) (Delplanque 2014)                                            |                                                                                                                                                                                | AD                |               |
| <i>TMEM67</i>           | *609884 | Meckel syndrome 3 (#607361) (Smith 2006)                                                              | Joubert syndrome 6 (#610688) (Baala 2007) / Bardet-Biedl syndrome (#209900) (Leitch 2008) / COACH syndrome (#216360) (Brancati 2008) / Nephronoptosis 11 (#613550) (Otto 2009) | AR                |               |
| <i>TPPA</i>             | *600415 | Ataxia with isolated vitamin E deficiency (#277460) (Ouahchi 1995)                                    |                                                                                                                                                                                | AR                |               |
| <i>TRAPPC11</i>         | *614138 | Limb-girdle muscular dystrophy type 2S (#615346) (Bogershausen 2013)                                  |                                                                                                                                                                                | AR                |               |
| <i>TTBK2</i>            | *611695 | Spinocerebellar ataxia type 11 (#604432) (Houlden 2007)                                               |                                                                                                                                                                                | AD                | Yes           |
| <i>TTC19</i>            | *613814 | Mitochondrial complex III deficiency nuclear type 2 (#615157) (Ghezzi 2011)                           |                                                                                                                                                                                | AR                |               |
| <i>UCHL1</i>            | *191342 | Neurodegeneration with optic atrophy (#615491) (Bilguvar 2013)                                        | Possible role in Parkinson disease (Leroy 1998)                                                                                                                                | AR                |               |
| <i>USP8</i>             | *603158 | ?Autosomal recessive spastic paraplegia type 59 (Novarino 2014)                                       |                                                                                                                                                                                | AR                |               |
| <i>VAMP1</i>            | *185880 | Spastic ataxia 1 (#108600) (Bourassa 2012)                                                            |                                                                                                                                                                                | AD                | Yes           |
| <i>VCP</i>              | *601023 | Inclusion body myopathy with Paget disease of bone and frontotemporal dementia (#167320) (Watts 2004) | Amyotrophic lateral sclerosis 14 with or without frontotemporal dementia (#613954) (Johnson 2010) / Charcot-Marie-Tooth disease type 2Y (#616687) (Gonzalez 2014)              | AD                |               |
| <i>VPS37A</i>           | *609927 | Autosomal recessive spastic paraplegia type 53 (#614898) (Zivony-Elboum 2012)                         |                                                                                                                                                                                | AR                |               |
| <i>WDR45</i>            | *300526 | Neurodegeneration with brain iron accumulation 5 (#300894) (Haack 2012)                               |                                                                                                                                                                                | XLD               |               |
| <i>WDR48</i>            | *612167 | ?Spastic paraplegia 60 (Novarino 2014)                                                                |                                                                                                                                                                                | AR                |               |
| <i>WFS1</i>             | *606201 | Wofram syndrome 1 (#222300) (Strom 1998) (AR)                                                         | Nonsyndromic sensorineural deafness (#600965) (Bespalova 2001) (AD) / Wolfram-like syndrome (#614296) (AD) (Domenech 2002)                                                     | AR / AD           |               |

| <b>Gene Symbol<br/>(continued)</b> | <b>OMIM #</b> | <b>Original phenotype</b>                                                        | <b>Phenotypic extension</b>                                                                                                                                  | <b>Transmission<br/>mode</b> | <b>ADCA<br/>analysis</b> |
|------------------------------------|---------------|----------------------------------------------------------------------------------|--------------------------------------------------------------------------------------------------------------------------------------------------------------|------------------------------|--------------------------|
| <i>WWOX</i>                        | *605131       | Autosomal recessive spinocerebellar ataxia-12 (SCAR12) (#614322) (Mallaret 2014) | Early infantile epileptic encephalopathy-28 (#616211) (Abdel-Salam 2014) / NB: mutated in ovarian carcinoma and esophageal squamous cell carcinoma (somatic) | AR                           |                          |
| <i>XPA</i>                         | *611153       | XPA: Xeroderma pigmentosum group A (#278700) (Tanaka 1990)                       |                                                                                                                                                              | AR                           |                          |
| <i>XPC</i>                         | *613208       | XPC: Xeroderma pigmentosum group C (#278720) (Li 1993)                           |                                                                                                                                                              | AR                           |                          |
| <i>ZFR</i>                         | *615635       | ?Spastic paraplegia 71 (Novarino 2014)                                           |                                                                                                                                                              | AR                           |                          |
| <i>ZFYVE26</i>                     | *612012       | SPG15: autosomal recessive spastic paraplegia type 15 (#270700) (Hanein 2008)    |                                                                                                                                                              | AR                           |                          |
| <i>ZNF423</i>                      | *604557       | Nephronoptosis 14 (#614844) (Alcaraz 2006) (AR)                                  | Joubert syndrome 19 (#614844) (Chaki 2012) (AD)                                                                                                              | AR / AD                      |                          |



eTable 2. List of Possibly to Definitely Causative Variants

| Patient ID  | Clinical Group | Conclusion <sup>a</sup> | AR or AD | Gene   | Variant                                         | Pathogenic Predictions | GERP ++   | Comments                                           | Coverage of Both Alleles | Sanger Sequencing | Segregation      |
|-------------|----------------|-------------------------|----------|--------|-------------------------------------------------|------------------------|-----------|----------------------------------------------------|--------------------------|-------------------|------------------|
| AAR-130-1   | AOA-like       | 1a                      | AR       | ADCK3  | NM_020247.4:c.125delC;p.A42fs;c.148C>T;p.Q50X   | Frameshift/nonsense    | NA        | Trans on bam files                                 | 29,26;18,12              | NA                | NA               |
| AAR-646-1   | Spastic        | 1a                      | AR       | ADCK3  | NM_020247.4:c.811C>T;p.R271C;c.1460C>G;p.T487R  | 4/4                    | 4.09/5.51 | Matching clinics                                   | 31,23;41,22              | NA                | TRUE (trans) (1) |
| AAR-311-13  | Metabolic      | 2                       | AR       | ADCK3  | hom NM_020247.4:c.238C>T;p.H80Y                 | 1/4                    | 4.52      | Divergent clinics                                  | 0,36                     | NA                | TRUE (2)         |
| AAR-615-1   | Pure           | 2                       | AR       | ADCK3  | hom NM_020247.4:c.911C>T;p.A304V                | 4/4                    | 5.57      | Matching clinics but unusually late age of onset   | 0,79                     | NA                | NA               |
| SAL-399-32  | Late complex   | 1a                      | AD       | AFG3L2 | NM_006796.2:c.1961C>T;p.T654I                   | Known                  | NA        | Matching clinics                                   | 9,11                     | NA                | NA               |
| SAL-399-307 | Metabolic      | 1a                      | AD       | AFG3L2 | NM_006796.2:c.121C>T;p.R41X                     | Nonsense               | NA        | Matching clinics                                   | 26,16                    | NA                | NA               |
| SAL-399-489 | Spastic        | 2                       | AD       | AFG3L2 | NM_006796.2:c.232C>T;p.P78S                     | 2/4                    | 5.36      | Not in hotspot domains, matching clinics           | 22,20                    | NA                | NA               |
| AAR-182-9   | Spastic        | 1a                      | AR       | ALS2   | hom NM_020919.3:c.3619delA;p.M1207X             | Nonsense               | NA        | Matching clinics (SLA-like)                        | 0,44                     | TRUE              | NA               |
| AAR-180-11  | Spastic        | 1a                      | AR       | ANO10  | hom NM_018075.4:c.132dupA;p.D45fs               | Frameshift             | NA        | Recurrent                                          | 0,23                     | NA                | NA               |
| SAL-399-177 | Spastic        | 1a                      | AR       | ANO10  | hom NM_018075.4:c.289delA;p.M97X                | Nonsense               | NA        | Matching clinics                                   | 2,26                     | NA                | NA               |
| AAR-645-1   | Spastic        | 1a                      | AR       | ANO10  | hom NM_018075.4:c.132dupA;p.D45fs               | Frameshift             | NA        | Recurrent, segregates                              | 0,2                      | TRUE              | TRUE (1)         |
| AAR-211-3   | AOA-like       | 2                       | AR       | ANO10  | NM_018075.4:c.132dupA;p.D45fs;c.1537T>C;p.C513R | Frameshift/4/4         | 5.24      | Unusual clinics (sensory polyneuropathy, AOA-like) | 33,18;19,24              | NA                | TRUE (trans) (1) |
| AAR-355-3   | AOA-like       | 1a                      | AR       | APTXX  | hom NM_001195249.1:c.837G>A;p.W279X             | Nonsense               | NA        | Matching clinics                                   | 0,30                     | TRUE              | TRUE (1)         |

|             |           |    |    |          |                                                            |                |           |                                                  |             |      |                  |
|-------------|-----------|----|----|----------|------------------------------------------------------------|----------------|-----------|--------------------------------------------------|-------------|------|------------------|
| AAR-550-1   | Metabolic | 1b | AR | ATM      | hom NM_000051.3:c.9022C>T:p.R3008C; hom c.5185G>C:p.V1729L | 4/4            | 5.22      | Recurrent, matching clinics                      | 1,19;0,18   | NA   | NA               |
| AAR-431-5   | Metabolic | 1a | AR | C10orf2  | NM_021830.4:c.716C>A:p.P239H;c.1502T>C:p.M501T             | 3/4/4/4        | 5.54/5.73 | Matching clinics                                 | 51,39;24,14 | NA   | TRUE (trans) (1) |
| AFT-76-10   | Metabolic | 1a | AD | CACN AIA | NM_001127222.1:c.2493dupC:p.N832fs                         | Frameshift     | NA        | Divergent clinics (epilepsy)                     | 53,37       | NA   | NA               |
| AAR-173-1   | Pure      | 1a | AD | CACN AIA | NM_001127222.1:c.4633C>T:p.R1545X                          | Nonsense       | NA        | Matching clinics (episodic ataxia)               | 22,17       | NA   | NA               |
| SAL-399-9   | Pure      | 1a | AD | CACN AIA | NM_001127222.1:c.4979G>A:p.R1660H                          | 4/4            | 3.26      | Near to known variants, matching clinics         | 33,23       | NA   | NA               |
| SAL-399-186 | Spastic   | 1a | AD | CACN AIA | NM_001127222.1:c.4997G>A:p.R1666Q                          | 4/4            | 4.96      | Aminoacid known to be mutated, matching clinics  | 28,32       | NA   | NA               |
| SAL-399-498 | Pure      | 2  | AD | CACN AIA | NM_001127222.1:c.889G>A:p.G297R                            | 4/4            | 5.42      | Near to known variants, matching clinics         | 39,44       | NA   | NA               |
| AAR-492-3   | Pure      | 2  | AD | CACN AIA | NM_001127222.1:c.4034G>A:p.R1345Q                          | 4/4            | 5.4       | Near to known variants, matching clinics         | 26,24       | NA   | NA               |
| SAL-399-194 | Metabolic | 1a | AR | CEP290   | NM_025114.3:c.1079G>A:p.R360Q;c.4962_4963del:p.Q1654fs     | Frameshift/3/4 | 5.43      | Matching clinics                                 | 15,15;19,13 | NA   | NA               |
| AAR-120-4   | Metabolic | 1a | AR | CLN5     | hom NM_006493.2:c.755A>G:p.N252S                           | 4/4            | 5.84      | Matching clinics (cardiomyopathy, optic atrophy) | 1,14        | NA   | NA               |
| AAR-320-1   | Spastic   | 1a | AR | CYP7B1   | NM_004820.4:c.440G>A:p.G147D;c.825T>A:p.Y275X              | Nonsense /3/4  | 5.17      | Matching clinics                                 | 14,16;10,8  | NA   | NA               |
| AAR-463-3   | Spastic   | 1a | AR | CYP7B1   | hom NM_004820.4:c.907T>G:p.W303G                           | 4/4            | 5.67      | Matching clinics                                 | 0,13        | NA   | TRUE (2)         |
| SAL-399-229 | Spastic   | 1b | AR | CYP7B1   | hom NM_004820.4:c.524G>A:p.W175X                           | NA             | NA        | Matching clinics, very high levels of oxysterols | 0,32        | NA   | NA               |
| AAR-73-4    | Spastic   | 1a | AR | ERCC5    | hom NM_000123.3:c.3004C>T:p.Q1002X                         | Nonsense       | NA        | Matching clinics                                 | 0,31        | TRUE | TRUE (2)         |
| AAR         | Spastic   | 1a | AR | GB       | M_020944.2:c.517T>C:p.W17                                  | Frameshift     | 4.2       | Matching clinics                                 | 44,32;3     | NA   | NA               |

|             |              |    |    |                 |                                                           |                  |                   |                                                                       |                 |            |                                           |
|-------------|--------------|----|----|-----------------|-----------------------------------------------------------|------------------|-------------------|-----------------------------------------------------------------------|-----------------|------------|-------------------------------------------|
| -69-4       | c            |    |    | A2              | 3R;c.712_715del;p.V238fs                                  | ft/4/4           | 7                 |                                                                       | 1,15            |            |                                           |
| AAR-498-1   | AOA-like     | 1a | AR | HE<br>XA        | hom<br>NM_000520.5:c.1511G>A:p.R504H                      | 2/4              | 5.7<br>1          | Matching clinics, very low hexaminidase                               | 0,20            | NA         | NA                                        |
| AAR-354-1   | Spastic      | 2  | AR | HE<br>XA        | NM_000520.5:c.739C>T;p.R247W;c.1033G>A:p.G345S            | 3/4/3/4          | 3.7<br>2/3.<br>33 | Matching clinics                                                      | 21,20;2<br>1,35 | NA         | NA                                        |
| AAR-224-1   | Metabolic    | 1b | AR | HS<br>D17<br>B4 | NM_001199291.2:c.817C>T;p.R273C;c.1207G>A:p.G403R         | 4/4/4/4          | 5.5<br>1/5.<br>49 | Matching clinics (white matter changes)                               | 18,30;3<br>9,38 | NA         | TRUE (trans)<br>(2, monozygous twins)     |
| SAL-399-257 | Pure         | 2  | AD | ITP<br>RI       | NM_001168272.1:c.3785T>A:p.I1262N                         | 4/4              | 5.2<br>4          | Matching clinics                                                      | 6,4             | NA         | NA                                        |
| AAR-266-1   | Late complex | 2  | AD | ITP<br>RI       | NM_001168272.1:c.2012A>G:p.N671S                          | 1/4              | 1.3               | Matching clinics (late complex, dystonia, parkinsonism)               | 58,54           | NA         | NA                                        |
| AAR-636-3   | Pure         | 2  | AD | KC<br>ND<br>3   | NM_004980.4:c.641A>G:p.K214R                              | 2/4              | 5.5<br>1          | Matching clinics (episodic ataxia)                                    | 0,5             | TRUE (het) | NA; unaffected mother carries the variant |
| SAL-208-1   | Spastic      | 1a | AR | KIF<br>IC       | hom<br>NM_006612.5:c.2836C>T;p.Q946X                      | Nonsense         | NA                | Matching clinics                                                      | 0,27            | TRUE       | TRUE (1)                                  |
| AAR-388-6   | Spastic      | 1a | AR | KIF<br>IC       | hom<br>NM_006612.5:c.1019dupG;p.R340fs                    | Frameshift       | NA                | Matching clinics                                                      | 0,106           | TRUE       | TRUE (2)                                  |
| SAL-399-457 | AOA-like     | 2  | AR | PL<br>A2<br>G6  | NM_003560.3:c.1116C>G:p.F372L;c.2233_2244del:p.745_748del | Indel/3/4        | 2.0<br>8          | Divergent clinics (AOA-like)                                          | 32,42;6<br>1,23 | NA         | NA                                        |
| FSP-819-3   | Spastic      | 1a | AR | PL<br>A2<br>G6  | NM_003560.3:c.1903C>T;p.R635X;c.T2411C;p.L804P            | Nonsense<br>/2/4 | 4.2<br>9          | Matching clinics, matching RMI signs (T2 hyposignals of the pallidum) | 8,9;25,<br>16   | NA         | TRUE (trans)<br>(1)                       |
| SAL-244-3   | Metabolic    | 1b | AR | PM<br>M2        | NM_000303.2:c.T470C;p.F157S;c.G722C;p.C241S               | 4/4/3/4          | 5.2<br>2/5.<br>22 | Matching clinics                                                      | 17,29;5<br>4,59 | NA         | NA                                        |
| AAR-45-13   | Spastic      | 1a | AR | PN<br>PL<br>A6  | hom<br>NM_001166111.1:c.2633G>A:p.G878D                   | 4/4              | 4.9<br>8          | In hotspot domain, matching clinics                                   | 0,14            | NA         | NA                                        |
| AAR-611-14  | Pure         | 2  | AR | PN<br>PL<br>A6  | NM_001166111.1:c.1483C>A:p.P495T;c.1857G>T;p.Q619H        | 2/4/2/4          | 4.9<br>9/1.<br>72 | Matching clinics (hypogonadism)                                       | 49,51;2<br>0,33 | NA         | NA                                        |
| SAL-399-222 | Spastic      | 1a | AR | PO<br>LG        | hom<br>NM_001126131.1:c.2243G>C:p.W748S                   | 3/4              | 5.5<br>7          | Recurrent, matching clinics (spastic, sensory polyneuropathy)         | 0,90            | NA         | NA                                        |
| AAR         | Meta         | 1a | AR | PO              | hom                                                       | 3/4              | 5.5               | Recurrent, matching clinics                                           | 0,64            | NA         | TRUE (2)                                  |

|             |                  |    |    |                |                                                     |                  |                   |                                                                  |                 |      |          |
|-------------|------------------|----|----|----------------|-----------------------------------------------------|------------------|-------------------|------------------------------------------------------------------|-----------------|------|----------|
| -407-13     | bolitic          |    |    | LG             | NM_001126131.1:c.2243G>C:p.W748S                    |                  | 7                 | (ophthalmoplegia, polyneuropathy)                                |                 |      |          |
| AAR-127-1   | Pure             | 1a | AR | PR<br>KC<br>G  | hom<br>NM_002739.4:c.767T>C:p.M256T                 | 3/3 (LRT<br>NA)  | 4.1<br>1          | Near to known homozygous variants                                | 0,48            | NA   | NA       |
| AAR-132-7   | Pure             | 1a | AD | PR<br>KC<br>G  | NM_002739.4:c.303C>G:p.H101Q                        | Known            | NA                | Matching clinics                                                 | 51,46           | NA   | NA       |
| SAL-399-897 | Late compl<br>ex | 1a | AD | PR<br>KC<br>G  | NM_002739.4:c.368G>T:p.G123V                        | 3/3 (LRT<br>NA)  | 4.7<br>5          | Aminoacid known to be mutated, matching clinics                  | 20,17           | NA   | NA       |
| SAL-399-443 | Spastic          | 2  | AD | PR<br>KC<br>G  | NM_002739.4:c.221A>G:p.H74R                         | 3/3 (LRT<br>NA)  | 4.6<br>8          | Near to known variants, divergent clinics (deafness, late onset) | 39,26           | NA   | NA       |
| AAR-350-3   | Metabolic        | 1a | AR | RN<br>F21<br>6 | hom<br>NM_207111.3:c.1754C>T:p.T585M                | 3/4              | 5.6               | Matching clinics (white matter changes, psychiatric)             | 0,54            | NA   | NA       |
| AAR-408-7   | Pure             | 1a | AR | RN<br>F21<br>6 | hom<br>NM_207111.3:c.1489T>A:p.F497I                | 3/4              | 5.4<br>8          | Matching clinics                                                 | 2,25            | NA   | NA       |
| AAR-111-5   | Spastic          | 1a | AR | SA<br>CS       | hom<br>NM_014363.5:c.12220G>C:p.A4074P              | 3/4              | 5.3<br>1          | Recurrent, matching clinics (spastic, deafness)                  | 0,22            | NA   | NA       |
| AAR-196-10  | Spastic          | 1a | AR | SA<br>CS       | hom<br>NM_014363.5:c.2018dupA:p.N673fs              | Frameshift       | NA                | Matching clinics (demyelinating polyneuropathy)                  | 0,12            | TRUE | TRUE (1) |
| AAR-334-9   | Spastic          | 1b | AR | SA<br>CS       | NM_014363.5:c.2881C>T:p.R961X;c.8108G>A:p.R2703H    | Nonsense<br>/4/4 | 5.5<br>6          | Matching clinics                                                 | 52,56;4<br>0,47 | NA   | NA       |
| AAR-340-3   | Spastic          | 1a | AR | SA<br>CS       | hom<br>NM_014363.5:c.11779dupG:p.A3927fs            | Frameshift       | NA                | Matching clinics though late onset (43)                          | 1,24            | TRUE | TRUE (2) |
| AAR-618-1   | Metabolic        | 1a | AR | SA<br>CS       | hom<br>NM_014363.5:c.12220G>C:p.A4074P              | 3/4              | 5.3<br>1          | Recurrent, matching clinics (demyelinating polyneuropathy)       | 0,28            | NA   | NA       |
| SAL-249-3   | Metabolic        | 2  | AR | SA<br>CS       | NM_014363.5:c.8339T>G:p.F2780C;c.12677A>T:p.Q4226L  | 4/4/3/4          | 5.4<br>4/5.<br>32 | Non excluding clinics (epilepsy, myoclony)                       | 54,48;4<br>7,35 | NA   | NA       |
| SAL-399-77  | Spastic          | 2  | AR | SA<br>CS       | NM_014363.5:c.4718T>G:p.M1573R;c.8227delC:p.H2743fs | Frameshift/2/4   | 4.9<br>8          | Matching clinics                                                 | 16,20;5<br>5,41 | NA   | NA       |
| AAR-532-3   | Spastic          | 2  | AR | SA<br>CS       | NM_014363.5:c.2983G>T:p.V995F;c.7586C>T:p.T2529I    | 0/4/4/4          | -<br>6.8<br>4/5.  | Matching clinics                                                 | 26,19;2<br>2,20 | NA   | NA       |

|             |           |    |         |           |                                                          |                                  |                   |                                                                 |                           |                               |                                                    |
|-------------|-----------|----|---------|-----------|----------------------------------------------------------|----------------------------------|-------------------|-----------------------------------------------------------------|---------------------------|-------------------------------|----------------------------------------------------|
|             |           |    |         |           |                                                          |                                  | 72                |                                                                 |                           |                               |                                                    |
| AAR-152-3   | Metabolic | 1a | AR      | SE<br>TX  | hom<br>NM_015046.6:c.7138C>G;p.R2380G                    | 4/4                              | 5.1<br>7          | Matching clinics                                                | 1,43                      | NA                            | TRUE (trans)<br>(1)                                |
| AAR-268-3   | AOA-like  | 1a | AR      | SE<br>TX  | NM_015046.6:c.6017G>A;p.C2006Y;c.7319A>G;p.D2440G        | 4/4/4/4                          | 4.5<br>8/4.<br>84 | Matching clinics, elevated alpha-fetoprotein                    | 59,74;3<br>,3             | TRUE                          | TRUE (trans)<br>(1)                                |
| AAR-308-14  | AOA-like  | 1a | R       | SE<br>TX  | hom<br>NM_015046.6:c.2659C>T;p.Q887X                     | Nonsense                         |                   | Matching clinics, elevated alpha-fetoprotein                    | 0,12                      | NA                            | NA                                                 |
| AAR-328-15  | Pure      | 1a | AR      | SE<br>TX  | hom<br>NM_015046.6:c.7267G>A;p.G2423R                    | 4/4                              | 5.3<br>1          | Matching clinics (demyelinating polyneuropathy)                 | 0,10                      | NA                            | TRUE (2)                                           |
| SAL-399-144 | Sensory   | 1a | AA<br>R | SE<br>TX  | hom<br>NM_015046.6:c.5224G>A;p.D1742N;c.5227T>C;p.Y1743H | 4/4/3/4                          | 5.7<br>1/5.<br>71 | Matching clinics                                                | 0,25                      | NA                            | NA                                                 |
| AAR-586-6   | AOA-like  | 1a | AR      | SE<br>TX  | NM_015046.6:c.4075C>T;p.Q1359X;c.6694C>T;p.R2232C        | Nonsense<br>/4/4                 | 5.6<br>9          | Matching clinics, elevated alpha-fetoprotein                    | 10,12;1<br>6,10           | NA                            | TRUE (trans)<br>(1)                                |
| AAR-171-1   | Sensory   | 2  | AR      | SE<br>TX  | hom<br>NM_015046.6:c.7249T>G;p.Y2417D                    | 2/4                              | 5.3<br>1          | Matching clinics (sensory ataxia, demyelinating polyneuropathy) | 0,9                       | TRUE                          | NA                                                 |
| AAR-3-5     | Metabolic | 1a | AR      | SN<br>X14 | NM_153816.5:c.709C>T;p.R237X;c.1108G>A;p.E370K           | Nonsense<br>/3/3<br>(SIFT<br>NA) | 5.3<br>9          | Matching clinics (deafness)                                     | 16,15;1<br>5,10           | NA                            | TRUE (trans)<br>(2)                                |
| AAR-12-26   | Spastic   | 1a | AR      | SP<br>G11 | hom<br>NM_025137.3:c.2315T>A;p.L772X                     | Nonsense                         | NA                | Matching clinics                                                | 0,63                      | NA                            | TRUE (1);<br>unaffected<br>sibling<br>heterozygous |
| SAL-607-4   | Spastic   | 1b | AR      | SP<br>G11 | NM_025137.3:c.4252delA;p.M1418fs;ex7 del                 | Frameshift/Del                   | NA                | Matching clinics                                                | 3,13;co<br>verage<br>drop | TRUE/con<br>firmed on<br>MLPA | NA                                                 |
| AAR-40-9    | Spastic   | 1a | AR      | SP<br>G7  | hom<br>NM_003119.3:c.1529C>T;p.A510V                     | Known                            | NA                | Matching clinics                                                | 1,32                      | NA                            | NA                                                 |
| AAR-81-8    | Spastic   | 1a | AR      | SP<br>G7  | NM_003119.3:c.1529C>T;p.A510V;c.1747T>C;p.W583R          | Known/4/<br>4                    | 4.7<br>3          | Matching clinics                                                | 19,19;3<br>0,12           | NA                            | TRUE (3)                                           |
| AAR-331-6   | NA        | 1a | AR      | SP<br>G7  | hom<br>NM_003119.3:c.1529C>T;p.A510V                     | Known                            | NA                | NA                                                              | 0,42                      | NA                            | NA                                                 |
| AAR-339-1   | Spastic   | 1a | AR      | SP<br>G7  | hom<br>NM_003119.3:c.1529C>T;p.A510V                     | Known                            | NA                | Matching clinics                                                | 0,37                      | NA                            | TRUE (2)                                           |

|             |              |    |    |                |                                                     |                   |      |                                                    |             |                          |                      |
|-------------|--------------|----|----|----------------|-----------------------------------------------------|-------------------|------|----------------------------------------------------|-------------|--------------------------|----------------------|
| SAL-399-45  | Spastic      | 1a | AR | SP<br>G7       | NM_003119.3:c.233T>A:p.L78X;c.1529C>T:p.A510V       | Nonsense/Unknown  | NA   | Matching clinics                                   | 18,24;5,2   | TRUE (A510V)             | NA                   |
| SAL-399-216 | Spastic      | 1a | AR | SP<br>G7       | NM_003119.3:c.1529C>T:p.A510V;c.2084T>C:p.L695P     | Known/4/4         | 5.21 | Matching clinics                                   | 5,2;34,24   | New DNA sample requested | NA                   |
| SAL-399-225 | Spastic      | 1a | AR | SP<br>G7       | NM_003119.3:c.1894G>A:p.G632R;c.1529C>T:p.A510V     | Known/4/4         | 5.93 | Matching clinics                                   | 35,24;17,15 | NA                       | NA                   |
| SAL-399-327 | Spastic      | 1a | AR | SP<br>G7       | NM_003119.3:c.233T>A:p.L78X;c.1529C>T:p.A510V       | Nonsense/Unknown  | NA   | Matching clinics + cognitive decline               | 32,32;21,28 | NA                       | NA                   |
| SAL-399-473 | Spastic      | 1a | AR | SP<br>G7       | NM_003119.3:c.86G>A:p.W29X;c.1529C>T:p.A510V        | Nonsense/Unknown  | NA   | Matching clinics                                   | 2,8;23,23   | NA                       | NA                   |
| SAL-399-566 | Metabolic    | 1a | AR | SP<br>G7       | NM_003119.3:c.1529C>T:p.A510V;c.2228T>C:p.I743T     | Known/4/4         | 4.49 | Matching clinics                                   | 25,43;38,21 | NA                       | NA                   |
| SAL-399-961 | Metabolic    | 1a | AR | SP<br>G7       | NM_003119.3:c.1529C>T:p.A510V;c.1972G>A:p.A658T     | Known/3/4         | 5.06 | Matching clinics (ophthalmoplegia, brisk reflexes) | 4,7;47,18   | TRUE (A510V)             | NA                   |
| AAR-541-9   | Spastic      | 1a | AR | SP<br>G7       | NM_003119.3:c.1519C>T:p.Q507X;c.1529C>T:p.A510V     | Nonsense/Unknown  | NA   | Matching clinics                                   | 4,13;14,4   | NA                       | TRUE (3)             |
| AAD-847-18  | Metabolic    | 1a | AR | SP<br>G7       | hom NM_003119.3:c.1529C>T:p.A510V                   | Known             | NA   | Matching clinics                                   | 3,40        | NA                       | TRUE (3)             |
| AAR-628-1   | Spastic      | 1b | AR | SP<br>G7       | NM_003119.3:c.1408C>T:p.R470X;c.1715C>T:p.A572V     | Known             | NA   | Matching clinics                                   | 40,45;49,42 | NA                       | NA                   |
| AAR-449-3   | Spastic      | 1a | AD | SPT<br>BN<br>2 | NM_006946.2:c.1472T>C:p.L491P                       | 4/4               | 4.47 | Second spectrin repeat, matching clinics           | 32,22       | NA                       | NA                   |
| AAR-61-11   | Pure         | 1a | AR | SY<br>NE<br>I  | hom NM_182961.3:c.11946_11947insTT:p.L3983fs        | Frameshift        | NA   | Matching clinics                                   | 0,67        | NA                       | NA                   |
| AAR-163-6   | Late complex | 1a | AR | SY<br>NE<br>I  | hom NM_182961.3:c.16228C>T:p.R5410X                 | Nonsense          | NA   | Matching clinics                                   | 0,21        | NA                       | NA                   |
| SAL-399-573 | Spastic      | 1a | AR | SY<br>NE<br>I  | NM_182961.3:c.14273T>G:p.L4758X;c.23346G>A:p.W7782X | Nonsense/nonsense | NA   | Matching clinics                                   | 31,38;59,37 | NA                       | NA                   |
| AAR-536-    | Pure         | 1a | AR | SY<br>NE       | hom NM_182961.3:c.4561C>T:p.R                       | Nonsense          | NA   | Matching clinics                                   | 0,35        | TRUE                     | TRUE (1); unaffected |

|              |         |    |    |                                    |                                                                    |            |                   |                                            |               |    |  |                      |
|--------------|---------|----|----|------------------------------------|--------------------------------------------------------------------|------------|-------------------|--------------------------------------------|---------------|----|--|----------------------|
| 4            |         |    |    | <i>I</i>                           | 1521X                                                              |            |                   |                                            |               |    |  | sibling heterozygous |
| AAR-241-13   | Pure    | 1b | AR | <i>SY</i><br><i>NE</i><br><i>I</i> | NM_182961.3:c.638T>C:p.F213S;c.2755A>T:p.K919X;c.24931C>G:p.Q8311E | NA         | NA                | Matching clinics                           | 5,4;14,22;5,5 | NA |  | NA                   |
| SAL-399-1023 | Sensory | 2  | AR | <i>SY</i><br><i>NE</i><br><i>I</i> | NM_182961.3:c.11187G>T:p.K3729N;c.23179G>A:p.D7727N                | 2/4/3/4    | 3.0<br>5/5.<br>99 | Nonexcluding clinics (ganglionopathy)      | 20,16;6,8     | NA |  | NA                   |
| SAL-399-171  | Spastic | 1a | AD | <i>TT</i><br><i>BK</i><br><i>2</i> | NM_173500.3:c.1302dupC:p.R435fs                                    | Frameshift | NA                | Matching clinics                           | 18,14         | NA |  | NA                   |
| AAR-218-3    | Sensory | 1b | AR | <i>TT</i><br><i>PA</i>             | hom<br>NM_000370.3:c.744delA:p.E248fs                              | NA         | NA                | Matching clinics                           | 0,12          | NA |  | NA                   |
| SAL-399-1035 | Spastic | 2  | AR | <i>TT</i><br><i>PA</i>             | NM_000370.3:c.265C>T:p.P89S;c.515C>G:p.T172S                       | 4/4/0/4    | 3.7<br>4/1.<br>30 | Divergent clinics, normal vitamin E levels | 30,17;23,25   | NA |  | NA                   |

Abbreviations: AD, autosomal dominant; AR, autosomal recessive; NA, not applicable.

<sup>a</sup>Variants are classified according to their pathogenicity classification as 1a (very probable/definite diagnosis), 1b (diagnosis made elsewhere during the study process, confirmed by our study, hence considered definite), or 2 (possible diagnosis). Reasons for classifying variants in categories 1a and 2 are listed for each variant. In silico pathogenicity software used were sorting intolerant from tolerant (SIFT), polymorphism phenotyping 2 (Polyphen2) HumDiv, LRT, and MutationTaster. Higher Genomic Evolutionary Rate Profiling (GERP++) conservation scores<sup>35</sup> (<http://mendel.stanford.edu/SidowLab/downloads/gerp/>) indicates better conservation. Variants were annotated with Annovar (<http://annovar.openbioinformatics.org/en/latest>).

**eTable 3.** Variants of Unknown Significance

| Patient ID   | Clinical group | AR/AD | Gene                         | Variant                                                                                                                                          |
|--------------|----------------|-------|------------------------------|--------------------------------------------------------------------------------------------------------------------------------------------------|
| SAL-399-861  | Pure           | AR    | <i>ARL6IP1</i>               | NM_015161.2:c.310A>T;p.R104X;c.349C>T;p.R117C                                                                                                    |
| SAL-399-264  | Late complex   | AR/AD | <i>ATM / RNF216 / SPTBN2</i> | NM_000051.3:c.320G>A;p.C107Y;c.334G>A;p.A112T;c.7313C>T;p.T2438I / NM_207111.3:c.436A>C;p.T146P;c.2686G>A;p.V896I / NM_006946.2:c.643G>A;p.V215M |
| AAR-155-4    | Metabolic      | AR    | <i>ATP7B</i>                 | NM_000053.3:c.1934T>G;p.M645R;c.4301C>T;p.T1434M                                                                                                 |
| SAL-399-545  | Spastic ataxia | AR    | <i>BSCL2</i>                 | NM_001122955.3:c.940G>A;p.V314M;c.1280T>C;p.L427P                                                                                                |
| AAR-27-12    | Sensory ataxia | AD    | <i>CACNA1A</i>               | NM_001127222.1:c.6001C>T;p.P2001S                                                                                                                |
| AAR-641-1    | Sensory ataxia | AD    | <i>CACNA1A</i>               | NM_001127222.1:c.5700C>G;p.I1900M                                                                                                                |
| AAR-400-10   | Spastic ataxia | AR    | <i>CACNA1A</i>               | hom NM_001127222.1:c.1357G>A;p.A453T                                                                                                             |
| AAR-95-16    | Spastic ataxia | AR    | <i>CLN5</i>                  | hom NM_006493.2:c.65G>T;p.R22L                                                                                                                   |
| AAR-592-1    | Pure           | AR    | <i>CLN6</i>                  | NM_017882.2:c.34G>A;p.A12T;c.44G>A;p.G15D                                                                                                        |
| AAR-613-1    | Metabolic      | AR/AD | <i>COL18A1 / KCNA1</i>       | NM_030582.3:c.2597G>A;p.R866Q;c.3842C>G;p.P1281R; NM_000217.2:c.922C>A;p.H308N                                                                   |
| AAR-262-5    | No group       | AR/AD | <i>CWF19L1 / CACNA1A</i>     | hom NM_018294.5:c.1363G>A;p.D455N; NM_001127222.1:c.6325G>A;p.G2109R;c.6335T>C;p.L2112P                                                          |
| SAL-399-836  | Spastic ataxia | AD    | <i>EEF2</i>                  | NM_001961.3:c.487G>A;p.A163T                                                                                                                     |
| SAL-399-1034 | Late complex   | AD    | <i>ELOVL5</i>                | NM_001242828.1:c.952G>T;p.V318L                                                                                                                  |
| AAR-661-1    | Late complex   | AD    | <i>ELOVL5</i>                | NM_001242828.1:c.212G>T;p.G71V                                                                                                                   |
| AAR-289-3    | Pure           | AD    | <i>GRID2</i>                 | NM_001510.3:c.2147A>G;p.N716S                                                                                                                    |
| AAR-383-7    | Pure           | AD    | <i>IFRD1 / POLG</i>          | NM_001550.3:c.440C>A;p.A147E / NM_001126131.1:c.1493A>C;p.K498T                                                                                  |
| AAR-493-9    | Metabolic      | AD    | <i>ITPR1</i>                 | NM_001168272.1:c.2107C>G;p.Q703E                                                                                                                 |



| Patient ID (continued) | Clinical group | AR/AD | Gene                  | Variant                                                                                 |
|------------------------|----------------|-------|-----------------------|-----------------------------------------------------------------------------------------|
| AAR-59-13              | Spastic ataxia | AD    | <i>ITPR1</i>          | NM_001168272.1:c.8194C>T;p.P2732S                                                       |
| SAL-209-1              | Late complex   | AD    | <i>KCNC3</i>          | NM_004977.2:c.1696C>T;p.P566S                                                           |
| AAR-29-9               | Spastic ataxia | AD    | <i>KCNC3</i>          | NM_004977.2:c.2096G>A;p.G699D                                                           |
| SAL-399-588            | Pure           | AR    | <i>KIF1C</i>          | NM_006612.5:c.1111G>A;p.A371T;c.2989G>A;p.G997R                                         |
| SAL-399-871            | Pure           | AR    | <i>KIF1C</i>          | NM_006612.5:c.1346A>G;p.K449R;c.2920G>A;p.D974N                                         |
| SAL-399-1040           | Late complex   | AR    | <i>LYST</i>           | NM_000081.3:c.8913T>G;p.N2971K;c.9017A>G;p.K3006R                                       |
| AAR-329-1              | No clinic      | AD    | <i>NOL3</i>           | NM_001276319.1:c.356G>C;p.R119T                                                         |
| MET-35-4               | Metabolic      | AR    | <i>OFD1</i>           | hom NM_003611.2:c.1294A>G;p.K432E                                                       |
| AAR-159-16             | Spastic ataxia | AD    | <i>OPA1</i>           | NM_130836.2:c.2341G>A;p.A781T                                                           |
| AAR-287-4              | Metabolic      | AD    | <i>PDYN</i>           | NM_001190898.2:c.616C>T;p.R206C                                                         |
| AAR-356-1              | Metabolic      | AR    | <i>PEX10</i>          | NM_153818.1:c.80G>A;p.S27N;c.88G>T;p.G30C                                               |
| AAR-606-1              | Metabolic      | AD    | <i>POLG</i>           | NM_001126131.1:c.729C>A;p.D243E                                                         |
| SAL-231-23             | Sensory ataxia | AD    | <i>POLG</i>           | NM_001126131.1:c.3151G>C;p.G1051R                                                       |
| AAR-256-3              | Metabolic      | AD    | <i>POLG</i>           | NM_001126131.1:c.655G>T;p.A219S                                                         |
| AAR-272-9              | Metabolic      | AR/AD | <i>POLG / ITPR1</i>   | NM_001126131.1:c.1550G>T;p.G517V;c.3076C>T;p.R1026C / NM_001168272.1:c.4288G>A;p.V1430M |
| AAR-539-1              | Metabolic      | AR    | <i>POLG / (SYNE1)</i> | hom NM_001126131.1:c.127_128insGGC;p.Q43delinsRQ / hom NM_182961.3:c.7976C>A;p.T2659N   |
| AAR-141-7              | Metabolic      | AR    | <i>PRICKLE1</i>       | NM_153026.2:c.370G>A;p.A124T;c.2236C>T;p.P746S                                          |
| AAR-264-6              | Late complex   | AD    | <i>SLCIA3</i>         | NM_004172.4:c.1544A>G;p.E515G                                                           |
| SAL-399-1013           | Pure           | AD    | <i>SLCIA3</i>         | NM_004172.4:c.67C>T;p.R23C                                                              |

| <b>Patient ID (continued)</b> | <b>Clinical group</b> | <b>AR/AD</b> | <b>Gene</b>    | <b>Variant</b>                                                        |
|-------------------------------|-----------------------|--------------|----------------|-----------------------------------------------------------------------|
| SAL-399-934                   | No group              | AR           | <i>SLC33A1</i> | NM_001190992.1:c.1136C>A:p.A379D;c.1141C>A:p.P381T                    |
| AAD-254-7                     | No group              | AR           | <i>SPAST</i>   | NM_014946.3:c.775G>A:p.G259S;c.844T>C:p.S282P;c.922A>G:p.T308A        |
| SAL-399-1042                  | Metabolic             | AD           | <i>SPTBN2</i>  | NM_006946.2:c.5168G>T:p.G1723V                                        |
| AAR-432-5                     | Metabolic             | AD           | <i>SPTBN2</i>  | NM_006946.2:c.2546_2548del:p.849_850del                               |
| AAR-18-10                     | Spastic ataxia        | AD           | <i>SPTBN2</i>  | NM_006946.2:c.5137C>T:p.R1713C                                        |
| AAR-240-15                    | Spastic ataxia        | AD           | <i>SPTBN2</i>  | NM_006946.2:c.805A>G:p.I269V                                          |
| AAR-281-3                     | Late complex          | AR           | <i>SYNE1</i>   | NM_182961.3:c.1964A>G:p.Q655R;c.13253A>G:p.N4418S                     |
| AAR-129-1                     | Spastic ataxia        | AR           | <i>SYNE1</i>   | NM_182961.3:c.8779C>T:p.R2927C;c.20182C>T:p.R6728C                    |
| AAR-546-3                     | Metabolic             | AR           | <i>SYNE1</i>   | NM_182961.3:c.5693A>G:p.N1898S,c.6908C>T:p.T2303M,c.22891C>T:p.L7631F |
| AAR-413-9                     | Pure                  | AR           | <i>SYNE1</i>   | NM_182961.3:c.2995G>A:p.E999K;c.12565G>A:p.V4189M;c.21758C>T:p.S7253L |
| AAR-291-4                     | Pure                  | AD           | <i>TGM6</i>    | NM_198994.2:c.730G>A:p.G244S                                          |
| SAL-399-966                   | Pure                  | AD           | <i>TTBK2</i>   | NM_173500.3:c.3406A>G:p.N1136D                                        |
| AAR-590-1                     | Late complex          | AD           | <i>VAMP1</i>   | NM_016830.3:c.344G >A:p.R115Q                                         |
